# Supplementary material for: Development of a Predictive Model and Nomogram for Neuropathy Risk in T2DM Patients
Source: Research Square preprint supplement (doi:10.21203/rs.3.rs-6556009/v1), 2025-09-01
Supplement: Supplementary file 1 [file 32582588c95f25cfe105088e.docx]

Table S2 Variables affecting the occurrence of neuropathy in type 2 diabetes mellitus by univariate logistic regression

| Variables | OR | CI | P |
| --- | --- | --- | --- |
| Smoking=1 | 0.835 | 0.758-0.919 | <0.001 |
| Drinking=1 | 0.861 | 0.777-0.954 | 0.004 |
| Gender=1 | 0.989 | 0.907-1.079 | 0.800 |
| KET=1 | 1.908 | 1.689-2.156 | <0.001 |
| BLD=1 | 1.042 | 0.938-1.156 | 0.444 |
| BIL=1 | 1.712 | 0.804-3.647 | 0.163 |
| PRO=1 | 0.736 | 0.662-0.818 | <0.001 |
| NIT=1 | 0.636 | 0.525-0.769 | <0.001 |
| GLU=1 | 0.801 | 0.733-0.876 | <0.001 |
| Age | 1.045 | 1.041-1.048 | <0.001 |
| HGB | 1.011 | 1.009-1.013 | <0.001 |
| WBC | 1.029 | 1.018-1.041 | <0.001 |
| RBC | 1.351 | 1.274-1.433 | <0.001 |
| BASO | 1.220 | 0.282-5.268 | 0.790 |
| PLT | 1.001 | 1.000-1.001 | 0.002 |
| EOS | 0.513 | 0.372-0.709 | <0.001 |
| MONO | 1.560 | 1.315-1.851 | <0.001 |
| LYM | 1.129 | 1.065-1.197 | <0.001 |
| NEU | 1.027 | 1.015-1.040 | <0.001 |
| BASO-R | 0.710 | 0.601-0.839 | <0.001 |
| MONO-R | 1.000 | 0.981-1.019 | 0.999 |
| LYM-R | 1.001 | 0.997-1.006 | 0.516 |
| NEU-R | 1.001 | 0.997-1.004 | 0.700 |
| PDW | 1.035 | 1.004-1.065 | 0.024 |
| EOS-R | 0.949 | 0.929-0.969 | <0.001 |
| PCT | 4.930 | 2.760-8.809 | <0.001 |
| MPV | 1.038 | 1.012-1.064 | 0.003 |
| RDW-CV | 1.069 | 1.036-1.104 | <0.001 |
| MCHC | 1.011 | 1.007-1.014 | <0.001 |
| MCH | 1.045 | 1.026-1.064 | <0.001 |
| MCV | 1.008 | 1.001-1.015 | 0.025 |
| HCT | 32.347 | 16.99-61.587 | <0.001 |
| ALT | 1.008 | 1.006-1.009 | <0.001 |
| TP | 1.013 | 1.008-1.018 | <0.001 |
| hsCRP | 0.998 | 0.997-0.999 | <0.001 |
| HCY | 0.999 | 0.992-1.006 | 0.734 |
| CHE | 1.000 | 1.000-1.000 | <0.001 |
| VLDL | 1.226 | 1.162-1.293 | <0.001 |
| A/G | 1.565 | 1.373-1.783 | <0.001 |
| GLO | 0.989 | 0.982-0.995 | 0.001 |
| TBA | 1.007 | 1.003-1.011 | 0.001 |
| PA | 1.001 | 1.000-1.001 | 0.001 |
| ALP | 1.003 | 1.003-1.004 | <0.001 |
| APOB | 1.743 | 1.512-2.009 | <0.001 |
| APOA1 | 0.891 | 0.777-1.021 | 0.098 |
| HDC-C | 0.772 | 0.692-0.861 | <0.001 |
| LDC-C | 1.146 | 1.099-1.196 | <0.001 |
| TC | 1.145 | 1.112-1.179 | <0.001 |
| IBIL | 1.029 | 1.019-1.038 | <0.001 |
| TG | 1.148 | 1.12-1.176 | <0.001 |
| LP-a | 1.000 | 1.000-1.000 | 0.003 |
| Mg | 0.981 | 0.921-1.045 | 0.551 |
| P | 1.490 | 1.296-1.713 | <0.001 |
| Ca | 0.315 | 0.244-0.408 | <0.001 |
| CO2 | 0.981 | 0.971-0.99 | <0.001 |
| Cl | 0.993 | 0.986-1.000 | 0.053 |
| Lac | 1.017 | 0.978-1.057 | 0.405 |
| CysC | 1.138 | 1,082-1.197 | <0.001 |
| Na | 0.989 | 0.982-0.996 | 0.002 |
| K | 0.886 | 0.824-0.952 | 0.001 |
| UA | 1.001 | 1.001-1.001 | <0.001 |
| Crea | 1.000 | 0.999-1.000 | 0.409 |
| Ure | 0.975 | 0.966-0.984 | <0.001 |
| GLU | 0.994 | 0.988-1.000 | 0.054 |
| DBIL | 1.022 | 1.012-1.033 | <0.001 |
| AFU | 1.014 | 1.01-1.018 | <0.001 |
| X5'-NT | 1.000 | 0.998-1.002 | 0.854 |
| ADA | 0.992 | 0.987-0.998 | 0.004 |
| TBIL | 1.017 | 1.012-1.023 | <0.001 |
| ALB | 1.031 | 1.024-1.038 | <0.001 |
| AST | 1.006 | 1.004-1.008 | <0.001 |
| GGT | 1.001 | 1.000-1.001 | 0.021 |
| PT-% | 1.007 | 1.005-1.009 | <0.001 |
| PT-INR | 0.498 | 0.377-0.657 | <0.001 |
| PT | 0.951 | 0.929-0.973 | <0.001 |
| NT-proBNP | 1.000 | 1.000-1.000 | 0.768 |
| CK-MB | 0.997 | 0.987-1.008 | 0.637 |
| Hs-TNT | 1.076 | 0.981-1.180 | 0.120 |
| MYO | 1.000 | 1.000-1.000 | 0.051 |
| TSH | 0.991 | 0.981-1.002 | 0.100 |
| FT3 | 0.821 | 0.787-0.856 | <0.001 |
| FT4 | 0.939 | 0.932-0.946 | <0.001 |
| LEU | 1.000 | 0.999-1.000 | 0.027 |
| HYAL | 0.972 | 0.943-1.002 | 0.069 |
| SG | 0.000 | 0.000-0.001 | <0.001 |
| PH | 1.012 | 0.953-1.074 | 0.704 |
| BYST | 1.000 | 0.999-1.000 | 0.286 |
| Path-CAST | 1.021 | 1.000-1.043 | 0.050 |
| X-TAL | 1.000 | 1.000-1.000 | 0.050 |
| EC | 1.007 | 1.004-1.009 | <0.001 |
| RBC-urine | 1.000 | 1.000-1.000 | 0.143 |
| WBC-urine | 1.000 | 1.000-1.000 | 0.002 |
| MBG | 1.001 | 0.994-1.008 | 0.735 |
| HbA1c | 1.007 | 0.994-1.020 | 0.318 |
| LDH | 1.000 | 1.000-1.000 | 0.639 |
| α-HBDH | 0.999 | 0.998-0.999 | <0.001 |
| CK | 0.999 | 0.999-0.999 | <0.001 |
| FDP | 1.013 | 1.007-1.020 | <0.001 |
| TT | 1.003 | 0.992-1.014 | 0.592 |
| Fib | 1.021 | 0.996-1.047 | 0.102 |
| AT3 | 1.002 | 0.999-1.004 | 0.177 |
| APTT | 0.976 | 0.969-0.982 | <0.001 |
| ESR | 0.994 | 0.992-0.995 | <0.001 |
| UALB | 1.000 | 1.000-1.001 | <0.001 |
| Total_Urine_Protein | 1.000 | 1.000-1.001 | <0.001 |
| X1-MG | 1.007 | 1.005-1.008 | <0.001 |
| NAG | 0.990 | 0.987-0.993 | <0.001 |
| PCT | 0.998 | 0.993-1.003 | 0.365 |
| D-Di | 1.028 | 1.015-1.042 | <0.001 |
| Clq | 1.000 | 1.000-1.001 | 0.030 |
| Ucr | 1.000 | 1.000-1.000 | <0.001 |

KET, urine ketone body; BLD, occult blood in urine; BIL, bilirubin; PRO, urinary protein; NIT, urinary nitrite; GLU, glucose; HGB, hemoglobin; WBC, white blood cell; RBC, red blood cell; BASO, basophil; PLT, platelet; EOS, eosinophil; MONO, monocyte; LYM, lymphocyte; NEU, neutrophil; BASO-R, basophil ratio; MONO-R, monocyte ratio; LYM-R, lymphocyte ratio; NEU-R, neutrophil ratio; PDW, platelet distribution width; EOS_R, eosinophil ratio; PCT-blood, plateletcrit-blood; MPV, mean platelet volume; RDW-CV, coefficient of variation of erythrocyte volume distribution width; MCHC, mean hemoglobin concentration of red blood cells; MCH, mean hemoglobin volume of red blood cells; MCV, mean erythrocyte volume; HCT, hematocrit; ALT, alanine aminotransferase; TP, total protein; hsCRP, hypersensitive C-reactive protein; HCY, homocysteine; CHE, choline esterase; VLDL, very low density lipoprotein; A/G, albumin/globulin ratio; GLO, globulin; TBA, total bile acids; PA, serum prealbumin; ALP, alkaline phosphatase; APOB, apolipoprotein B; APOA1, apolipoprotein A1; HDC-C, high density lipoprotein cholesterol; LDC-C, low density lipoprotein cholesterol; TC, total cholesterol; IBIL, indirect bilirubin; TG, triglyceride; LPa, lipoprotein (a); Lac, lactic acid; CysC, Cystatin C; UA, uric acid; Crea, creatinine; GLU, Glucose; DBIL, direct bilirubin; AFU, a-L-fucosidase; X5'-NT, 5'-nucleotidase; ADN, adenosine deaminase; TBIL, total bilirubin; ALB, albumin; AST, aspartate aminotransferase; GGT, r-glutamyltransferase; PT, prothrombin time; PT-%, plasminogen activity; PT-INR, international normalized ratio of prothrombin time; Hs-TNT, highly sensitive troponin T; MYO, myoglobin; CK, creatine kinase; NT-proBNP, N-terminal brain natriuretic peptide precursor; TSH, thyroid stimulating hormone; LEU, leukocyte esterase; HYAL, hyaluronic acid; SG, specific gravity of urine; BYST, Budding yeast; LDH, lactate d,ehydrogenase; HbA1c, glycated hemoglobin A1c; CK, creatine kinase; FDP, fibrin degradation products; TT, thrombin time; Fib, fibrinogen; AT3, antithrombin III; APTT, activated partial thromboplastin time; ESR, erythrocyte sedimentation rate; PCT-blood, plateletcrit-blood; D-Di, D-dimer; Ucr, urinary creatinine; a_HBDH, α-Hydroxybutyrate dehydrogenase; UALB, urinary albumin; NAG, N-acetyl glucosidase; Clq, complement 1q; X1-MG, α1-Microglobulin; FT4, free thyroxine.
