# Supplementary material for: Development of a Predictive Model and Nomogram for Neuropathy Risk in T2DM Patients
Source: Research Square preprint supplement (doi:10.21203/rs.3.rs-6556009/v1), 2025-09-01
Supplement: Supplementary file 2 [file 962117ec0ebaa5d572dfbe1d.docx]

Table S1 Comparison of features in training and testing sets.

| Variables | Training dataset | Testing dataset | *P* |
| --- | --- | --- | --- |
| Diabetic neuropathy | 5276 (61.3%) | 2250 (61.1%) | 0.777 |
| age | 62.00 (51.00, 72.00) | 63.00 (51.00, 71.00) | 0.781 |
| HGB | 127.00 (112.00, 141.00) | 127.00 (111.00, 141.00) | 0.986 |
| WBC | 6.70 (5.40, 8.67) | 6.78 (5.38, 8.84) | 0.167 |
| RBC | 4.23 (3.76, 4.67) | 4.22 (3.78, 4.67) | 0.894 |
| BASO | 0.02 (0.02, 0.03) | 0.02 (0.02, 0.03) | 0.957 |
| PLT | 179.00 (137.00, 228.00) | 181.00 (138.00, 232.00) | 0.082 |
| EOS | 0.09 (0.04, 0.16) | 0.09 (0.04, 0.16) | 0.765 |
| MONO | 0.39 (0.30, 0.52) | 0.39 (0.30, 0.53) | 0.483 |
| LYM | 1.47 (1.08, 1.90) | 1.48 (1.10, 1.91) | 0.340 |
| NEU | 4.49 (3.34, 6.33) | 4.55 (3.37, 6.49) | 0.151 |
| BASO-R | 0.30 (0.20, 0.50) | 0.30 (0.20, 0.50) | 0.658 |
| MONO-R | 5.80 (4.70, 7.10) | 5.70 (4.70, 7.00) | 0.118 |
| LYM-R | 22.80 (15.50, 30) | 22.7 (15.3, 29.9) | 0.493 |
| NEU-R | 68.40 (60.40, 76.70) | 68.40 (60.70, 77) | 0.340 |
| PDW | 16.40 (16.10, 16.70) | 16.50 (16.10, 16.70) | 0.503 |
| EOS-R | 1.40 (0.50, 2.60) | 1.40 (0.60, 2.60) | 0.803 |
| PCT | 0.21 (0.17, 0.25) | 0.22 (0.17, 0.25) | 0.062 |
| MPV | 11.30 (10.20, 12.60) | 11.30 (10.20, 12.70) | 0.530 |
| RDW-CV | 13.30 (12.70, 14.00) | 13.2 (12.7, 14) | 0.872 |
| MCHC | 328.00 (320.00, 335.00) | 327.00 (320.00, 335.00) | 0.213 |
| MCH | 30.10 (28.80, 31.20) | 30.00 (28.80, 31.20) | 0.256 |
| MCV | 91.50 (88.20, 94.80) | 91.50 (88.10, 94.80) | 0.535 |
| HCT | 0.39 (0.34, 0.43) | 0.39 (0.34, 0.43) | 0.630 |
| ALT | 17.71 (12.10, 27.36) | 17.30 (11.99, 26.22) | 0.091 |
| TP | 69.50 (63.84, 75.10) | 69.40 (63.81, 75.00) | 0.927 |
| hsCRP | 2.78 (0.86 12.84) | 2.78 (0.89, 14.83) | 0.562 |
| HCY | 10.40 (8.13, 13.20) | 10.34 (8.17, 13.05) | 0.524 |
| CHE | 7107.08 (5607.70, 8491.956) | 7176.00 (5599.58, 8613.135) | 0.096 |
| VLDL | 0.71 (0.48, 1.02) | 0.73 (0.50, 1.03) | 0.101 |
| A/G | 1.27 (1.04, 1.48) | 1.28 (1.04, 1.49) | 0.349 |
| GLO | 30.80 (26.8, 35.10) | 30.80 (27.00, 34.80) | 0.807 |
| TBA | 3.30 (1.98, 5.82) | 3.25 (1.91, 5.83) | 0.530 |
| PA | 189.3379 (133.4, 238.535) | 190.75 (132.40, 239.70) | 0.697 |
| ALP | 88.95 (71.20, 112.53) | 89.10 (71.50, 113.72) | 0.441 |
| APOB | 0.83 (0.65, 1.02) | 0.83 (0.66, 1.03) | 0.476 |
| APOA1 | 1.13 (0.95, 1.30) | 1.12 (0.95, 1.30) | 0.497 |
| HDC-C | 1.09 (0.86, 1.35) | 1.08 (0.86, 1.35) | 0.946 |
| LDL-C | 2.51 (1.90, 3.22) | 2.51 (1.90, 3.22) | 0.579 |
| TC | 4.49 (3.69, 5.38) | 4.54 (3.69, 5.43) | 0.245 |
| IBIL | 7.40 (5.10, 10.30) | 7.20 (5.00, 10.30) | 0.210 |
| TG | 1.43 (0.99, 2.25) | 1.44 (1, 20.3.08) | 0.177 |
| LP-a | 112.90 (49.40, 263.87) | 113.77 (51.11, 266.72) | 0.335 |
| Mg | 0.80 (0.74, 0.86) | 0.80 (0.74, 0.86) | 0.775 |
| P | 1.06 (0.90, 1.22) | 1.06 (0.89, 1.21) | 0.249 |
| Ca | 2.28 (2.18, 2.38) | 2.2799 (2.18, 2.376) | 0.706 |
| CO2 | 23.60 (21.30, 25.82) | 23.63 (21.25, 25.90) | 0.787 |
| Cl | 104.50 (101.20, 107.17) | 104.40 (101.30, 107.30) | 0.654 |
| Lac | 2.13 (1.61, 2.76) | 2.14 (1.62, 2.88) | 0.365 |
| CysC | 0.95 (0.73, 1.30) | 0.95 (0.73, 1.30) | 0.824 |
| Na | 140.09 (137.10, 142.51) | 140.20 (137.20, 142.60) | 0.716 |
| K | 3.89 (3.57, 4.20) | 3.88 (3.55, 4.19) | 0.171 |
| UA | 311.00 (243.96, 394.6) | 314.00 (247.58, 398.56) | 0.148 |
| Crea | 66.33 (51.40, 90.55) | 66.231 (51.40, 90.00) | 0.561 |
| Urea | 5.76 (4.40, 7.79) | 5.7618 (4.40, 7.89) | 0.623 |
| GLU | 9.18 (6.64, 13.3) | 9.191 (6.68, 13.24) | 0.958 |
| DBIL | 3.08 (2.20, 4.30) | 3.12 (2.20, 4.30) | 0.227 |
| AFU | 18.54 (13.44, 26.40) | 18.90 (13.33, 27.00) | 0.272 |
| X5'-NT | 3.63 (2.59, 5.29) | 3.60 (2.50, 5.24) | 0.632 |
| ADA | 14.14 (10.51, 19.13) | 14.30 (10.70, 19.30) | 0.175 |
| TBIL | 10.60 (7.59, 14.33) | 10.42 (7.57, 14.32) | 0.626 |
| ALB | 38.50 (34.30, 42.32) | 38.51 (34.60, 42.39) | 0.140 |
| AST | 21.44 (16.50, 29.04) | 21.50 (16.35, 29.58) | 0.767 |
| GGT | 24 (16.0088, 42.24) | 23.52 (15.90, 42.24) | 0.528 |
| PT-% | 103.00 (90.20, 117.00) | 103.00 (91.00, 117.00) | 0.653 |
| PT-INR | 0.98 (0.93, 1.06) | 0.98 (0.93, 1.05) | 0.688 |
| PT | 12.40 (11.50, 13.40) | 12.50 (11.5.000, 13.40) | 0.506 |
| NT-proBNP | 62.67 (24.47, 194.48) | 62.94 (24.65, 191.02) | 0.874 |
| CK-MB | 1.30 (0.78, 2.14) | 1.30 (0.79, 2.16) | 0.626 |
| Hs-TNT | 0.01 (0.00, 0.02) | 0.01 (0.00, 0.02) | 0.567 |
| MYO | 36.20 (23.18, 65.68) | 34.90 (22.61, 64.23) | 0.058 |
| TSH | 1.79 (1.07, 2.92) | 1.82 (1.12, 2.94) | 0.142 |
| FT3 | 2.79 (2.34, 3.470) | 2.80 (2.34, 3.52) | 0.428 |
| FT4 | 1.43 (1.19, 12.24) | 1.44 (1.20, 12.20) | 0.388 |
| LET | 0.00 (0.00, 25.00) | 0.00 (0.00, 25.00) | 0.515 |
| HYAL | 0.00 (0.00, 0.00) | 0.00 (0.00, 0.00) | 0.408 |
| SG | 1.02 (1.01, 1.03) | 1.02 (1.01, 1.03) | 0.772 |
| PH | 6.00 (5.50, 6.50) | 6.00 (5.50, 6.50) | 0.544 |
| BYST | 0.00 (0.00, 0.00) | 0.00 (0.00, 0.00) | 0.801 |
| Path-CAST | 0.00 (0.00, 0.00) | 0.00 (0.00, 0.00) | 0.827 |
| X-TAL | 0.00 (0.00, 1.76) | 0.00 (0.00, 1.76) | 0.818 |
| EC | 1.00 (0.00, 3.52) | 1.00 (0.00, 4) | 0.762 |
| RBC-urine | 3.00 (0.00, 9.00) | 2.64 (0.00, 9.00) | 0.563 |
| WBC-urine | 3.30. (1.00, 15.00) | 3.30 (1.00, 150) | 0.887 |
| MBG | 13.00 (9.57, 17.89) | 13.13 (9.57, 17.49) | 0.826 |
| HbA1c | 8.80 (7.00, 11.10) | 8.80 (7.00, 10.90) | 0.463 |
| LDH | 179.32 (154.00, 212.30) | 179.21 (153.93, 211.50) | 0.854 |
| α-HBDH | 131.838 (108.80, 163.50) | 132.515 (109.80, 164.38) | 0.194 |
| CK | 68.90 (41.97, 110.21) | 71 (43.35, 110.21) | 0.299 |
| FDP | 2.60 (1.90, 4.00) | 2.60 (1.90, 4.49) | 0.589 |
| TT | 18.10 (16.90, 19.10) | 18.10 (16.80, 19.10) | 0.409 |
| Fib | 3.78 (3.00, 5.07) | 3.75 (3.00, 4.99) | 0.953 |
| AT3 | 96.30 (85.20, 107.80) | 96.40 (85.00, 108.00) | 0.843 |
| APTT | 32.65 (29.10, 37.10) | 32.50 (28.80, 36.80) | 0.078 |
| ESR | 21.00 (8.00, 46.00) | 22.00 (8.00, 46.00) | 0.804 |
| UALB | 19.40 (6.80, 88.21) | 19.90 (6.60, 95.28) | 0.983 |
| Total urine protein | 31.70 (8.70, 130.55) | 29.10 (8.75, 124.895) | 0.732 |
| X1-MG | 12.60 (4.80, 30.04) | 13.10 (4.90, 30.76) | 0.170 |
| NAG | 10.90 (6.50, 17.40) | 10.80 (6.70, 17.85) | 0.581 |
| PCT | 0.08 (0.05, 0.29) | 0.08 (0.05, 0.30) | 0.284 |
| D-Di | 0.93 (0.66, 1.84) | 0.95 (0.66, 1.86) | 0.435 |
| Clq | 189.00 (163.30, 218.87) | 189.70 (165.20, 220.65) | 0.087 |
| Ucr | 6468.60 (4228.00, 10018.18) | 6412.10 (4273.20, 10006.15) | 0.879 |
| smoking | 2549 (29.6%) | 1076 (29.2%) | 0.639 |
| drinking | 2062 (24.0%) | 847 (23.0%) | 0.245 |
| gender | 4439 (51.6%) | 1847 (50.1%) | 0.134 |
| KET | 1212 (14.1%) | 534 (14.5%) | 0.582 |
| BLD | 1893 (22.0%) | 787 (21.4%) | 0.435 |
| BIL | 27 (0.3%) | 12 (0.3%) | 1.000 |
| PRO | 1960 (22.8%) | 794 (21.5%) | 0.136 |
| NIT | 542 (6.3%) | 205 (5.6%) | 0.126 |
| GLu-urine | 5377 (62.5%) | 2300 (62.4%) | 0.926 |

KET, urine ketone body; BLD, occult blood in urine; BIL, bilirubin; PRO, urinary protein; NIT, urinary nitrite; GLU, glucose; HGB, hemoglobin; WBC, white blood cell; RBC, red blood cell; BASO, basophil; PLT, platelet; EOS, eosinophil; MONO, monocyte; LYM, lymphocyte; NEU, neutrophil; BASO-R, basophil ratio; MONO-R, monocyte ratio; LYM-R, lymphocyte ratio; NEU-R, neutrophil ratio; PDW, platelet distribution width; EOS-R, eosinophil ratio; PCT-blood, plateletcrit-blood; MPV, mean platelet volume; RDW-CV, coefficient of variation of erythrocyte volume distribution width; MCHC, mean hemoglobin concentration of red blood cells; MCH, mean hemoglobin volume of red blood cells; MCV, mean erythrocyte volume; HCT, hematocrit; ALT, alanine aminotransferase; TP, total protein; hsCRP, hypersensitive C-reactive protein; HCY, homocysteine; CHE, choline esterase; VLDL, very low density lipoprotein; A/G, albumin/globulin ratio; GLO, globulin; TBA, total bile acids; PA, serum prealbumin; ALP, alkaline phosphatase; APOB, apolipoprotein B; APOA1, apolipoprotein A1; HDC-C, high density lipoprotein cholesterol; LDC-C, low density lipoprotein cholesterol; TC, total cholesterol; IBIL, indirect bilirubin; TG, triglyceride; LP-a, lipoprotein (a); Lac, lactic acid; CysC, Cystatin C; UA, uric acid; Crea, creatinine; GLU, Glucose; DBIL, direct bilirubin; AFU, a-L-fucosidase; X5'-NT, 5'-nucleotidase; ADN, adenosine deaminase; TBIL, total bilirubin; ALB, albumin; AST, aspartate aminotransferase; GGT, r-glutamyltransferase; PT, prothrombin time; PT-%, plasminogen activity; PT-INR, international normalized ratio of prothrombin time; Hs-TNT, highly sensitive troponin T; MYO, myoglobin; CK, creatine kinase; NT-proBNP, N-terminal brain natriuretic peptide precursor; TSH, thyroid stimulating hormone; LEU, leukocyte esterase; HYAL, hyaluronic acid; SG, specific gravity of urine; BYST, Budding yeast; LDH, lactate d,ehydrogenase; HbA1c, glycated hemoglobin A1c; CK, creatine kinase; FDP, fibrin degradation products; TT, thrombin time; Fib, fibrinogen; AT3, antithrombin III; APTT, activated partial thromboplastin time; ESR, erythrocyte sedimentation rate; PCT-blood, plateletcrit-blood; D-Di, D-dimer; Ucr, urinary creatinine; a_HBDH, α-Hydroxybutyrate dehydrogenase; UALB, urinary albumin; NAG, N-acetyl glucosidase; Clq, complement 1q; X1-MG, α1-Microglobulin; FT4, free thyroxine.
